# Supplementary material for: Enzymatic preparation of biotinylated naturally-occurring sialylglycan and its molecular recognition on a quartz-crystal microbalance
Source: Royal Society of Chemistry journal article supplement (doi:10.1039/b411082j), 2004-01-01
Supplement: b411082j_2.pdf [file b411082j_2.pdf]

## Enzymatic preparation of biotinylated naturally-occurring sialylglycan and its molecular recognition on a quartz-crystal microbalance

Toshiaki Mori, Yoshimi Sekine, Kenji Yamamoto, and Yoshio Okahata\*

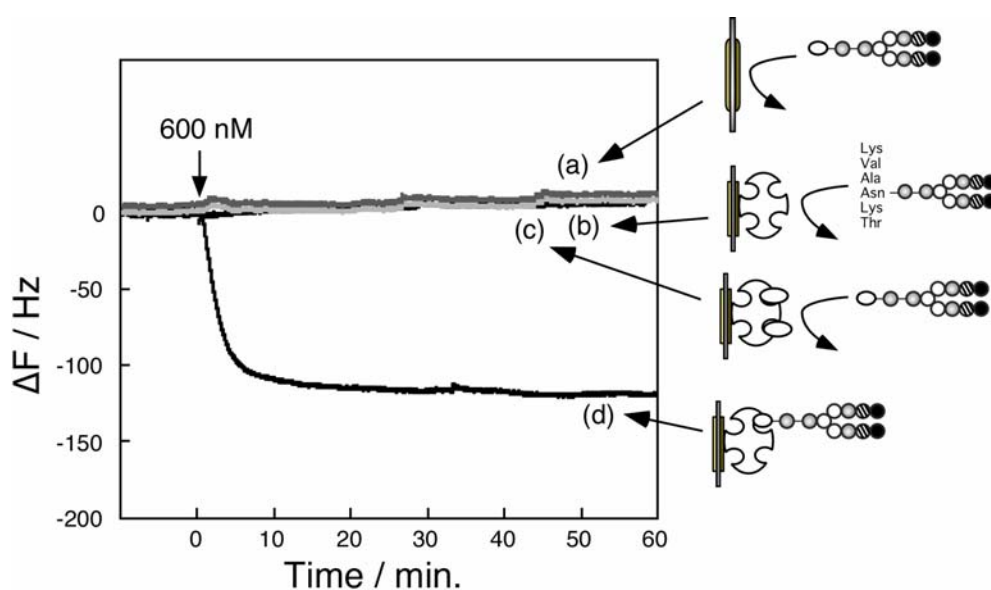

**Figure S1** Typical time courses of frequency decreases (mass increases) of (a) no binding of biotinylated sialylglycan to a bare Au electrode, (b) no binding of SGP to the NeutrAvidin-immobilized QCM, (c) the inhibition of biotin (1 mM) to the binding of biotinylated sialylglycan to the NeutrAvidin-immobilized QCM, and (d) the binding of biotinylated sialylglycan to the NeutrAvidin-immobilized QCM. [SGP] = [biotinylated sialylglycan] = 600 nM, 150 mM phosphate, pH 7.2, 150 mM NaCl, 25 °C.
